# Supplementary material
Source: bioRxiv or medRxiv preprint supplement (https://www.biorxiv.org/highwire/filestream/26879/field_highwire_adjunct_files/2/095265-3.pdf)
Supplement: Supplementary file [file 095265-3.pdf]

# CEN1

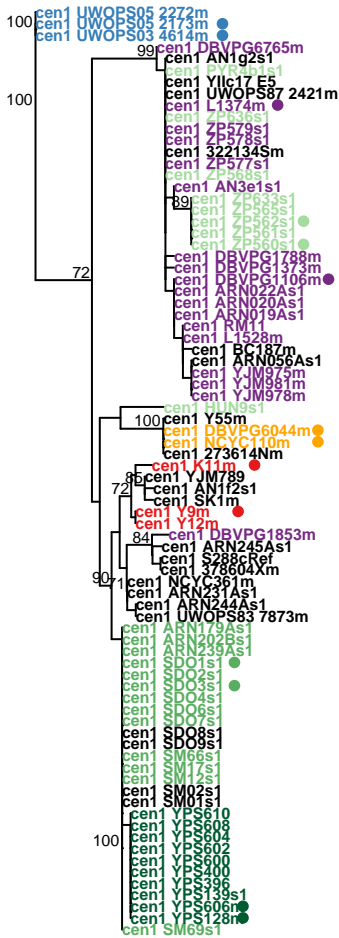

-0.005

# CEN2

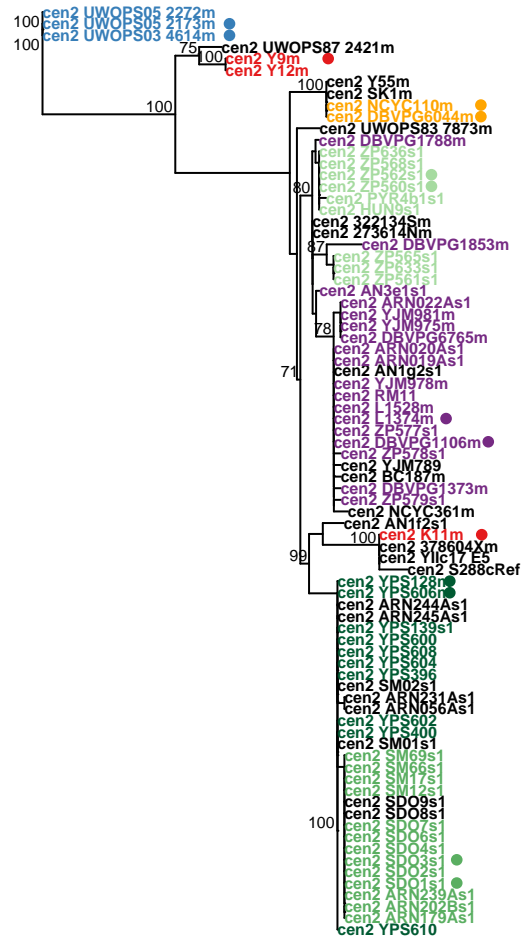

0.01

# CEN3

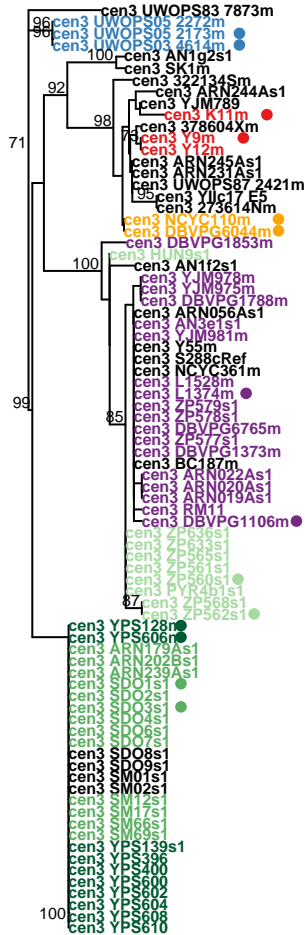

-0.005

# CEN4

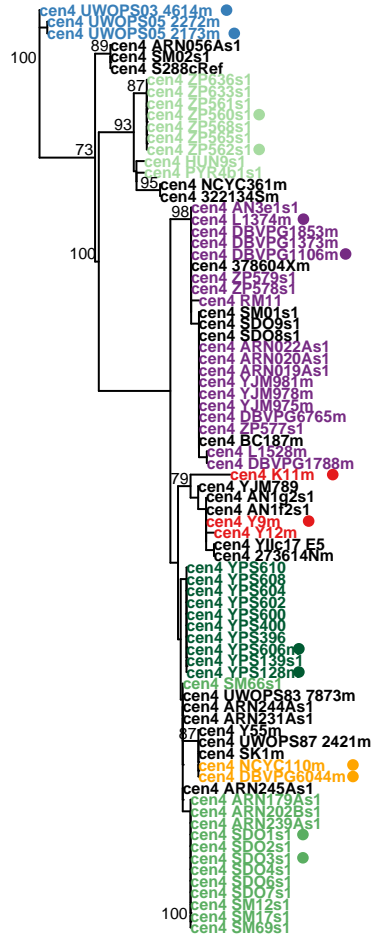

-0.005

# CEN5

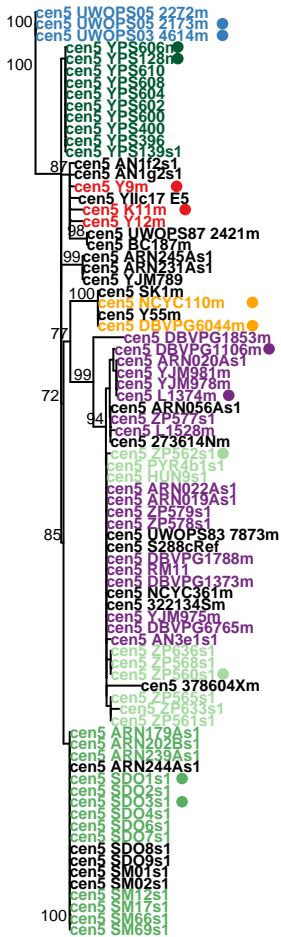

—0.005

# CEN6

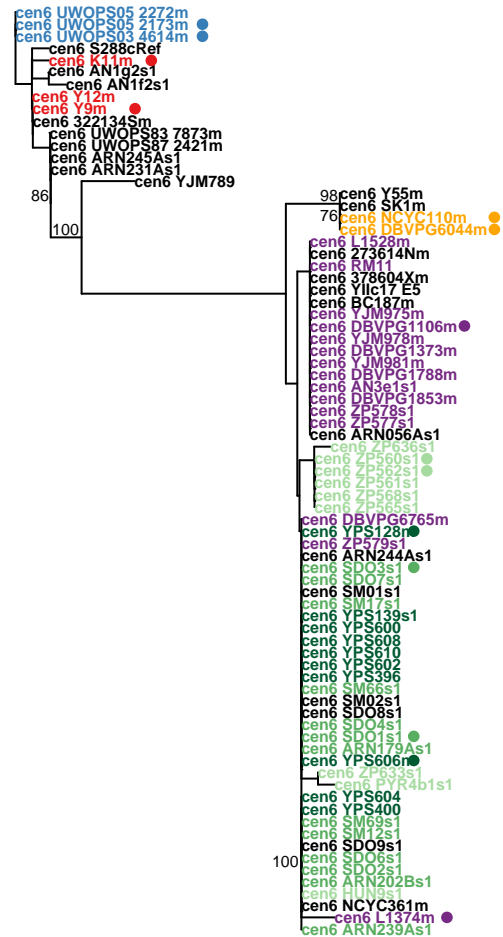

—0.01

## CEN7

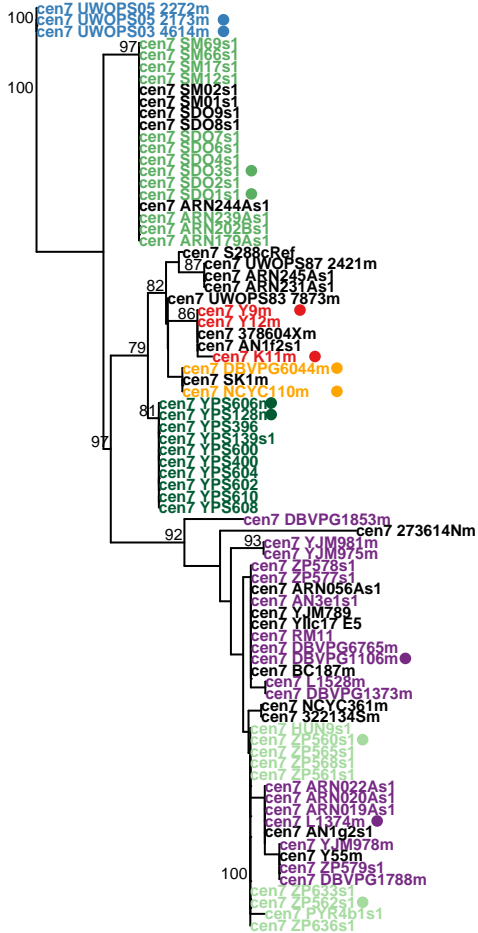

## CEN8

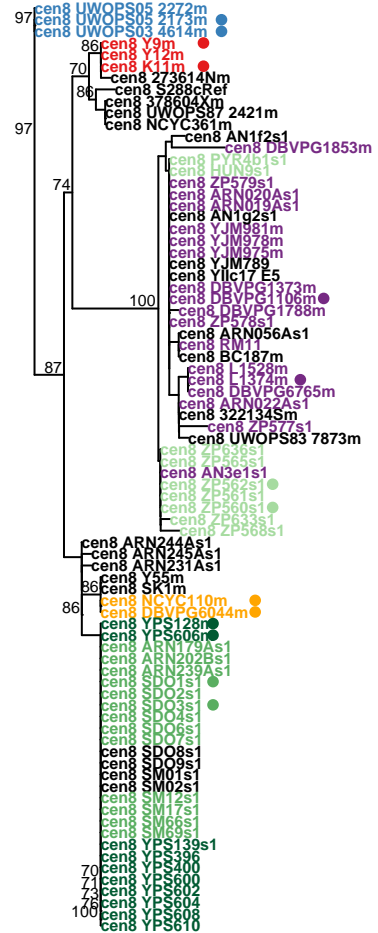

# CEN9

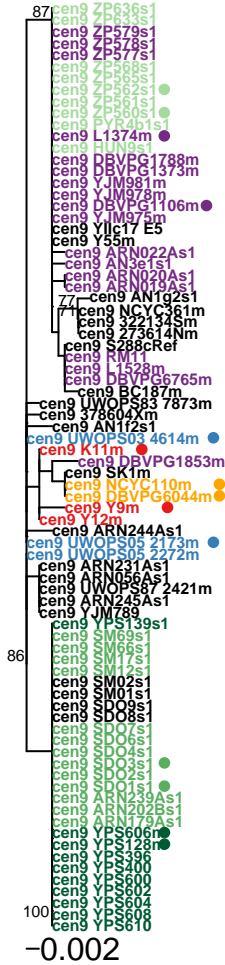

# CEN10

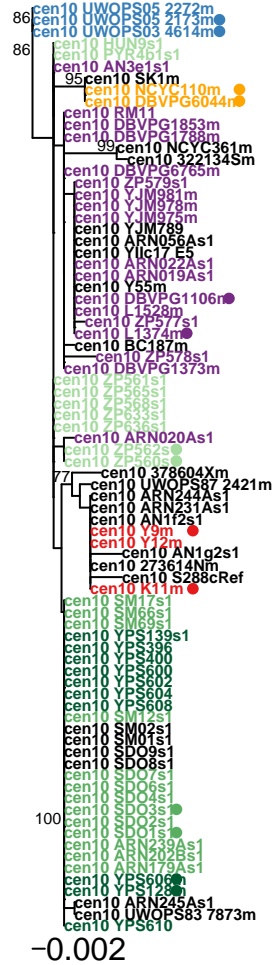

# CEN11

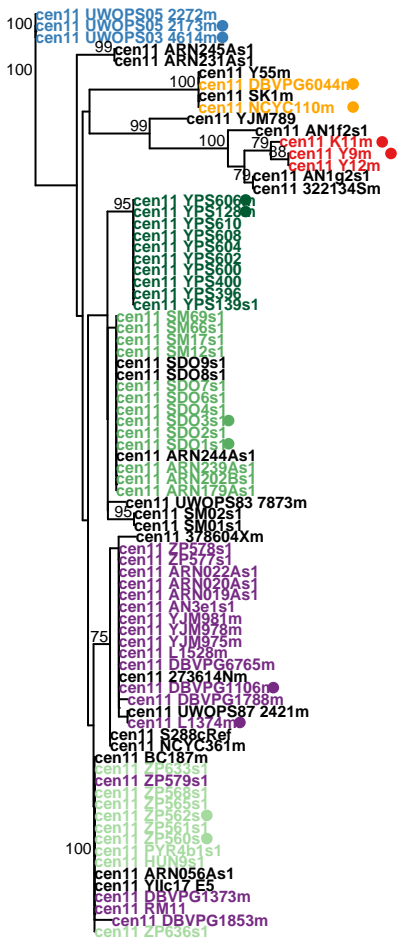

-0.005

# CEN12

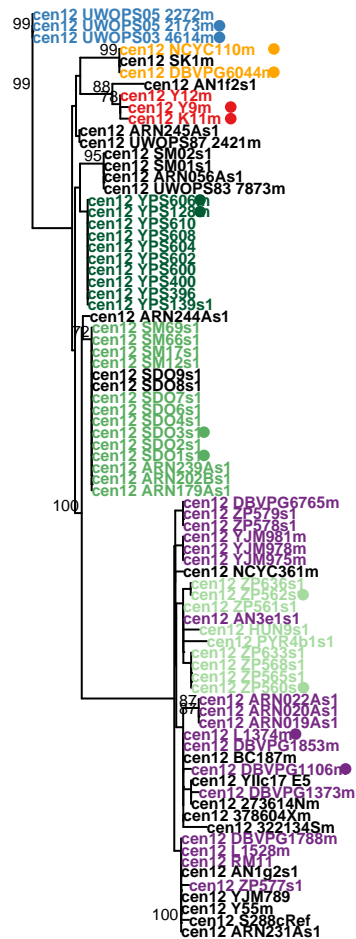

-0.005



# CEN15

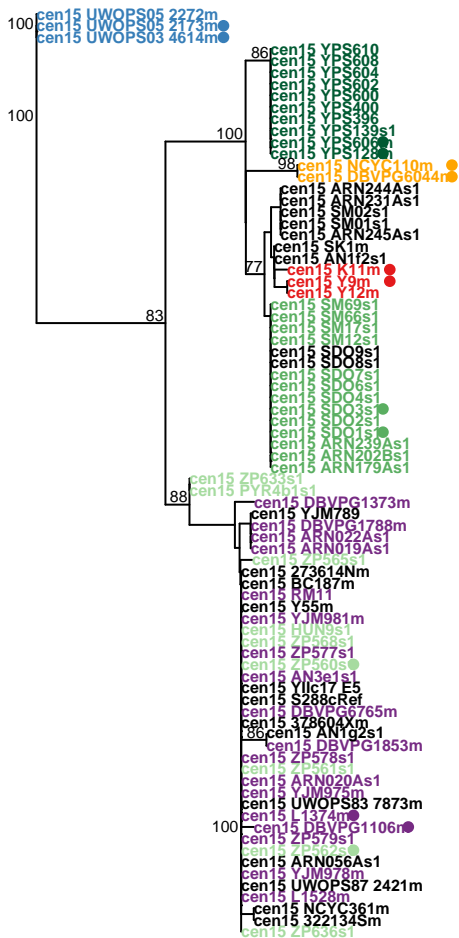

— 0.01

# CEN16

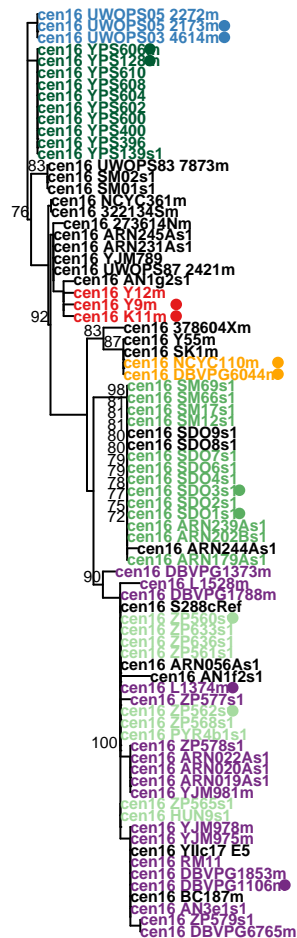

— 0.005
